# Supplementary material for: A DFT-D study on the electrochromic mechanism of ruthenium sulfoxide complexes
Source: Royal Society of Chemistry journal article supplement (doi:10.1039/c4ra06047d), 2014-09-15
Supplement: c4ra06047d1.pdf [file c4ra06047d1.pdf]

## Supporting Information for

### **A DFT-D Study on the Electrochromic Mechanism of Ruthenium Sulfoxide Complexes**

**Huifang Li\*, Lisheng Zhang, Hui Lin, Xiaolin Fan\***

*Key Laboratory of Organo-Pharmaceutical Chemistry, Gannan Normal University,  
Ganzhou 341000, R. R. China.*

#### **Table of Contents**

|                                                                                         |     |
|-----------------------------------------------------------------------------------------|-----|
| • Benchmark Calculation Details                                                         | S2  |
| • MOs and Spin Density Distributions and Reference                                      | S3  |
| • Table S1: Benchmark calculation results                                               | S5  |
| • Table S2: MOs energies and IP/EA results                                              | S5  |
| • Table S3: MOs and Spin density distributions                                          | S5  |
| • Table S4: TD-DFT results                                                              | S6  |
| • Table S5: Structure and energies of <i>S</i> -[Ru(bpy)(tpy)(dmsO)] <sup>2+</sup>      | S7  |
| • Table S6: Structure and energies of $\eta^2$ -[Ru(bpy)(tpy)(dmsO)] <sup>2+</sup>      | S9  |
| • Table S7: Structure and energies of <i>O</i> -[Ru(bpy)(tpy)(dmsO)] <sup>2+</sup>      | S11 |
| • Table S8: Structure and energies of <i>S</i> -[Ru(bpy)(tpy)(dmsO)] <sup>3+</sup>      | S13 |
| • Table S9: Structure and energies of $\eta^2$ -[Ru(bpy)(tpy)(dmsO)] <sup>3+</sup>      | S15 |
| • Table S10: Structure and energies of <i>O</i> -[Ru(bpy)(tpy)(dmsO)] <sup>3+</sup>     | S17 |
| • Table S11: Structure and energies of <i>S</i> -[Ru(bpy)(tpy)(dmsO)] <sup>+</sup>      | S19 |
| • Table S12: Structure and energies of $\eta^2$ -[Ru(bpy)(tpy)(dmsO)] <sup>+</sup>      | S21 |
| • Table S13: Structure and energies of <i>O</i> -[Ru(bpy)(tpy)(dmsO)] <sup>+</sup>      | S23 |
| • Figure S3: IRC for intramolecular isomerization in [Ru(bpy)(tpy)(dmsO)] <sup>2+</sup> | S25 |
| • Figure S3: IRC for intramolecular isomerization in [Ru(bpy)(tpy)(dmsO)] <sup>2+</sup> | S26 |
| • Figure S3: IRC for intramolecular isomerization in [Ru(bpy)(tpy)(dmsO)] <sup>2+</sup> | S27 |

## Benchmark Calculations

All calculations were performed using the Gaussian 09 package.<sup>13</sup> For the aim to find a better theoretical method for our study, molecular structure of the S-linked [Ru(bpy)(tpy)(dmsu)]<sup>2+</sup> in the ground state was optimized with different functionals, including B3LYP,<sup>14-16</sup>  $\omega$ B97X-D,<sup>17</sup> PBE0<sup>18</sup>, M062X<sup>19</sup> and B2PLYPD<sup>20</sup>, which were used in previous studies for ruthenium or other transition metal based complexes.<sup>11a,11c,21</sup> Two basis set systems were employed for calculations here: one basis set was made of a double- $\zeta$  quality basis set LANL2DZ and corresponding effective core potential for ruthenium<sup>22</sup>, all-electron 6-31G(d,p) basis sets for carbon, nitrogen, hydrogen, oxygen and sulfur atoms<sup>23</sup>. In another basis set, usual 6-31G(d,p) for nonmetal atoms and SDD for ruthenium<sup>24</sup>.

It is known that Ru-S is weak interaction and the bond length is overestimated by current density functional theory, as shown in previous report.<sup>9b</sup> Now, Dispersion effects that are missing in DFT functionals have been accounted for according to Grimme's correction scheme (DFT-D3).<sup>25</sup> The accuracy and reliability of the dispersion corrected density functional theory (DFT-D) approach for the description of weak interactions have been proved in recent studies.<sup>25-28</sup> Thereby, in optimization calculations, the empirical dispersion correction introduced by Grimme<sup>25</sup> was added to the DFT functional with Becke's and Johnson's rational damping function,<sup>29</sup> and dubbed this variant DFT-D3(BJ).

In addition, considering crystals suitable for structural determination were obtained by slow evaporation of saturated acetonitrile/ethanol solutions in experimental studies,<sup>7a</sup> solvent may play an important roles in geometry determination. Thus, for comparison, conductor-like polarizable continuum model (CPCM)<sup>30</sup> with solvent acetonitrile ( $\epsilon=35.688$ ) was also considered to optimize the involved geometries. Harmonic vibrational frequencies were calculated analytically at the same level to confirm that each stationary point was a minimum on the potential energy surface.

Optimized geometry parameters of the S-[ Ru(bpy)(tpy)(dmsu)]<sup>2+</sup> complex with different computational methods were collected in Table 1. Experimental determined

crystal structures were also listed in the table for comparison. It is found that Ru–S bond length obtained at the PBE0-D3(BJ)/[SDD/6-31G(d,p)] level (2.290 Å) is very close to that from experimental crystal structure (2.282 Å).

### MOs and Spin Density Distributions

The percentage of ruthenium or ligand character in some of the occupied (canonical) molecular orbitals (MOs) in the complexes was calculated from a full population analysis, using

$$\% Ru(Ligand) Character = \frac{\sum \phi_{Ru(ligand)}^2}{\sum \phi_{all}^2} \times 100\%$$

Where  $\sum \phi_i^2$  is the sum of the squares of the eigenvalues associated with the ruthenium atomic orbital (AO) (or all AOs involved in one ligand) and all of the AOs in a particular MO, respectively. Similar calculation was used for the percentage of ruthenium or ligand character in some of the occupied (canonical) spin density distributions in the complexes associated with the radical ion state.

### Reference

1. M. J. Frisch, G. W. Trucks, H. B. Schlegel, G. E. Scuseria, M. A. Robb, J. R. Cheeseman, G. Scalmani, V. Barone, B. Mennucci, G. A. Petersson, H. Nakatsuji, M. Caricato, X. Li, H. P. Hratchian, A. F. Izmaylov, J. Bloino, G. Zheng, J. L. Sonnenberg, M. Hada, M. Ehara, K. Toyota, R. Fukuda, J. Hasegawa, M. Ishida, T. Nakajima, Y. Honda, O. Kitao, H. Nakai, T. Vreven, J. A. Montgomery, Jr., J. E. Peralta, F. Ogliaro, M. Bearpark, J. J. Heyd, E. Brothers, K. N. Kudin, V. N. Staroverov, T. Keith, R. Kobayashi, J. Normand, K. Raghavachari, A. Rendell, J. C. Burant, S. S. Iyengar, J. Tomasi, M. Cossi, N. Rega, J. M. Millam, M. Klene, J. E. Knox, J. B. Cross, V. Bakken, C. Adamo, J. Jaramillo, R. Gomperts, R. E. Stratmann, O. Yazyev, A. J. Austin, R. Cammi, C. Pomelli, J. W. Ochterski, R. L. Martin, K. Morokuma, V. G. Zakrzewski, G. A. Voth, P. Salvador, J. J. Dannenberg, S. Dapprich, A. D. Daniels, O. Farkas, J. B. Foresman, J. V. Ortiz, J. Cioslowski, and D. J. Fox, Gaussian 09, Revision D.01, Gaussian, Inc.; Wallingford CT, **2013**.
2. A. D. Becke, *J. Chem. Phys.* **1993**, *98*, 5648–5652.
3. A. D. Becke, *Phys. Rev. A: Gen. Phys.* **1988**, *38*, 3098–3100.
4. C. Lee, W. Yang, R. G. Parr, *Phys. Rev. B: Condens. Matter Mater. Phys.* **1988**, *37*, 785–789.
5. J. D. Chai, M. Head-Gordon, *Phys. Chem. Chem. Phys.* **2008**, *10*, 6615–6620.
6. C. Adamo, V. Barone, *J. Chem. Phys.* **1999**, *110*, 6158–6170.
7. Y. Zhao, D. G. Truhlar, *Theor. Chem. Acc.* **2008**, *120*, 215–241.

8. S. Grimme, *J. Chem. Phys.* **2006**, *124*, 034108.
9. (a) J. P. Lomont, S. C. Nguyen, C. B. Harris, *J. Phys. Chem. A* **2013**, *117*, 2317–2324. (b) I. Ciofini, C. A. Daul, C. Adamo, *J. Phys. Chem. A* **2003**, *107*, 11182–11190. (c) D. A. Lutterman, A. A. Rachford, J. J. Rack, C. Turro, *J. Phys. Chem. A* **2009**, *113*, 11002–11006
10. (a) P. J. Hay, W. R. Wadt, *J. Chem. Phys.* **1985**, *82*, 270–283. (b) P. J. Hay, W. R. Wadt, *J. Chem. Phys.* **1985**, *82*, 299–310.
11. (a) W. J. Hehre, R. Ditchfie, J. Pople, A. *J. Chem. Phys.* **1972**, *56*, 2257–2261. (b) M. M. Francl, W. J. Pietro, W. J. Hehre, J. S. Binkley, M. S. Gordon, D. J. Defrees, J. A. Pople, *J. Chem. Phys.* **1982**, *77*, 3654–3665.
12. D. Andrae, U. Häussermann, M. Dolg, H. Stoll, H. Preuss, *Theor. Chim. Acta.* **1990**, *77*, 123–141.
13. (a) S. Grimme, J. Antony, S. Ehrlich, H. Krieg, *J. Chem. Phys.* **2010**, *132*, 154104; (b) L. Goerigk, S. Grimme, *Phys. Chem. Chem. Phys.* **2011**, *13*, 6670–6688.
14. K. Tonigold, A. Grob, *J. Comput. Chem.* **2012**, *33*, 695–701.
15. H. F. Li, L. S. Zhang, H. Lin, X. L. Fan, *Chem. Phys. Lett.* **2014**, *604*, 10–14.
16. K. S. Thanthiriwatte, E. G. Hohenstein, L. A. Burns, C. D. Sherrill. *J. Chem. Theo. Comput.* **2011**, *7*, 88–96.
17. (a) A. D. Becke, and E. R. Johnson, *J. Chem. Phys.* **2005**, *123*, 154101; (b) E. R. Johnson, and A. D. Becke, *J. Chem. Phys.* **2005**, *123*, 024101; (c) E. R. Johnson, and A. D. Becke, *J. Chem. Phys.* **2006**, *124*, 174104.
18. D. P. Butcher, J. A. A. Rachford, J. L. Petersen, J. J. Rack, *Inorg. Chem.* **2006**, *45*, 9178–9180.
19. V. Barone, M. Cossi, *J. Phys. Chem. A* **1998**, *102*, 1995–2001.
20. J. J. Rack, J. R. Winkler, H. B. Gray, *J. Am. Chem. Soc.* **2001**, *123*, 2432–2433.

**Table S1.** Main geometrical parameters for the  $S$ -[Ru(bpy)(tpy)(dmsO)]<sup>2+</sup>.

|                                   | B3LYP             | B3LYP   | M062X  | $\omega$ B97X-D | B2PLYPD | PBE0   | PBE0    | PBE0              | PBE0       | Exptl. |
|-----------------------------------|-------------------|---------|--------|-----------------|---------|--------|---------|-------------------|------------|--------|
|                                   | /BS1 <sup>a</sup> | -D3(BJ) | /BS1   | /BS1            | /BS1    | /BS1   | -D3(BJ) | -D3(BJ)           | -D3(BJ)    |        |
|                                   |                   | /BS1    |        |                 |         |        | /BS1    | /BS2 <sup>b</sup> | /BS2(CPCM) |        |
| <b>bond lengths</b>               |                   |         |        |                 |         |        |         |                   |            |        |
| <b>Ru-S</b>                       | 2.406             | 2.385   | 2.371  | 2.351           | 2.340   | 2.346  | 2.324   | 2.290             | 2.288      | 2.282  |
| <b>S-O</b>                        | 1.505             | 1.509   | 1.496  | 1.492           | 1.505   | 1.496  | 1.495   | 1.496             | 1.505      | 1.467  |
| <b>Ru-N<sub>t</sub>'</b>          | 2.140             | 2.114   | 2.155  | 2.123           | 2.107   | 2.107  | 2.094   | 2.082             | 2.081      | 2.079  |
| <b>Ru-N<sub>t</sub>''</b>         | 2.014             | 2.003   | 2.026  | 2.006           | 1.998   | 1.992  | 1.986   | 1.978             | 1.979      | 1.975  |
| <b>Ru-N<sub>t</sub>'''</b>        | 2.131             | 2.109   | 2.144  | 2.118           | 2.104   | 2.101  | 2.088   | 2.078             | 2.075      | 2.073  |
| <b>Ru-N<sub>b</sub>'</b>          | 2.167             | 2.140   | 2.174  | 2.148           | 2.138   | 2.136  | 2.122   | 2.112             | 2.103      | 2.100  |
| <b>Ru-N<sub>b</sub>''</b>         | 2.118             | 2.102   | 2.130  | 2.112           | 2.099   | 2.096  | 2.087   | 2.086             | 2.080      | 2.084  |
| <b>angles</b>                     |                   |         |        |                 |         |        |         |                   |            |        |
| <b>O-S-Ru</b>                     | 112.83            | 114.22  | 113.10 | 114.37          | 114.91  | 113.46 | 114.08  | 114.84            | 115.62     | 115.70 |
| <b>S-Ru-N<sub>t</sub>'</b>        | 93.02             | 92.23   | 92.04  | 92.36           | 92.40   | 92.82  | 92.50   | 92.66             | 92.53      | 91.30  |
| <b>S-Ru-N<sub>t</sub>''</b>       | 87.55             | 87.10   | 86.56  | 87.69           | 87.69   | 87.40  | 87.04   | 88.10             | 89.12      | 90.31  |
| <b>S-Ru-N<sub>b</sub>'</b>        | 95.35             | 96.04   | 96.43  | 96.44           | 96.59   | 95.54  | 95.87   | 96.01             | 96.17      | 96.89  |
| <b>dihedral angles</b>            |                   |         |        |                 |         |        |         |                   |            |        |
| <b>d(O-S-Ru-N<sub>t</sub>''')</b> | -61.92            | -61.70  | -62.27 | -64.03          | -64.07  | -61.24 | -60.89  | -60.49            | -58.51     | -58.39 |
| <b>d(O-S-Ru-N<sub>b</sub>'')</b>  | 38.54             | 38.39   | 38.45  | 36.29           | 36.33   | 39.13  | 39.27   | 39.81             | 42.08      | 42.55  |

<sup>a</sup> Basis set 1 (BS1) was made of a double- $\zeta$  quality basis set LANL2DZ and corresponding effective core potential for Ru, all-electron 6-31G(d,p) basis sets for carbon, nitrogen, hydrogen, oxygen and sulfur atoms.

<sup>b</sup> In basis set 2 (BS2), usual 6-31G(d,p) for nonmetal atoms and SDD for Ru.

**Table S2.** The frontier MOs energies, ionization potentials as well as electron affinities for the ground state of [Ru(bpy)(tpy)(dmsO)]<sup>2+</sup> complexes.

|                                                   | HOMO | LUMO | IP  | EA   |
|---------------------------------------------------|------|------|-----|------|
| <b><i>S</i>-[Ru(bpy)(tpy)(dmsO)]<sup>2+</sup></b> | -6.8 | -2.8 | 6.1 | -3.3 |
| <b><i>O</i>-[Ru(bpy)(tpy)(dmsO)]<sup>2+</sup></b> | -6.1 | -2.6 | 5.4 | -3.1 |

**Table S3.** Main distributions of the frontier MOs as well as spin densities in the [Ru(bpy)(tpy)(dmsO)]<sup>2+</sup> complexes.

|             | <b><i>S</i>-[Ru(bpy)(tpy)(dmsO)]<sup>2+</sup></b> |      |         |       | <b><i>O</i>-[Ru(bpy)(tpy)(dmsO)]<sup>2+</sup></b> |      |         |       |
|-------------|---------------------------------------------------|------|---------|-------|---------------------------------------------------|------|---------|-------|
|             | Ru(II)                                            |      | Ru(III) | Ru(I) | Ru(II)                                            |      | Ru(III) | Ru(I) |
|             | HOMO                                              | LUMO | Spin    | Spin  | HOMO                                              | LUMO | Spin    | Spin  |
| <b>Ru</b>   | 77.1                                              | 9.5  | 95.0    | 3.7   | 74.5                                              | 9.4  | 91.2    | 5.0   |
| <b>dmsO</b> | 1.0                                               | 4.5  | 0       | 0     | 6.4                                               | 3.5  | 6.2     | 1.1   |
| <b>bpy</b>  | 8.8                                               | 2.2  | 1.7     | 0     | 6.4                                               | 2.5  | 0       | 0     |
| <b>tpy</b>  | 13.2                                              | 83.8 | 4.4     | 96.5  | 12.7                                              | 84.7 | 3.1     | 94.0  |

**Table S4** Vertical absorption energies (in eV), dominated orbital excitations, oscillator strength ( $f$ ) obtained from TD-DFT calculations. The absorption (emission) energies are based on the S0 (T1) state equilibrium geometry.

|                                            | Abs.                           | dominated orbitals | E    | $f$  | Exptl. ( $\lambda_{\text{max}}$ ) |
|--------------------------------------------|--------------------------------|--------------------|------|------|-----------------------------------|
| <b>S-[Ru(bpy)(tpy)(dmsO)]<sup>2+</sup></b> | S <sub>0</sub> →S <sub>1</sub> | HOMO→LUMO(98%)     | 2.64 | 0.00 |                                   |
|                                            | S <sub>0</sub> →S <sub>2</sub> | HOMO-1→LUMO(96%)   | 2.83 | 0.03 |                                   |
|                                            | S <sub>0</sub> →S <sub>3</sub> | HOMO→LUMO+1(96%)   | 3.07 | 0.00 |                                   |
|                                            | S <sub>0</sub> →S <sub>4</sub> | HOMO-2→LUMO(59%)   | 3.17 | 0.01 |                                   |
|                                            | S <sub>0</sub> →S <sub>5</sub> | HOMO→LUMO+2(79%)   | 3.29 | 0.04 |                                   |
|                                            | S <sub>0</sub> →S <sub>6</sub> | HOMO-1→LUMO+2(42%) | 3.37 | 0.05 | 412nm(3.01) <sup>a</sup>          |
| <b>O-[Ru(bpy)(tpy)(dmsO)]<sup>2+</sup></b> | S <sub>0</sub> →S <sub>1</sub> | HOMO→LUMO(95%)     | 2.27 | 0.01 |                                   |
|                                            | S <sub>0</sub> →S <sub>2</sub> | HOMO-1→LUMO(94%)   | 2.52 | 0.00 |                                   |
|                                            | S <sub>0</sub> →S <sub>3</sub> | HOMO→LUMO+1(55%)   | 2.68 | 0.00 |                                   |
|                                            | S <sub>0</sub> →S <sub>4</sub> | HOMO→LUMO+2(83%)   | 2.77 | 0.01 |                                   |
|                                            | S <sub>0</sub> →S <sub>5</sub> | HOMO-1→LUMO+1(32%) | 2.93 | 0.04 | 490nm(2.53) <sup>a</sup>          |
|                                            | S <sub>0</sub> →S <sub>6</sub> | HOMO-1→LUMO+2(52%) | 2.99 | 0.04 |                                   |

<sup>a</sup> Ref. 20.

**Table S5.** Optimized Cartesian coordinates and energies of the  $S$ -[Ru(bpy)(tpy)(dmsO)]<sup>2+</sup> at PBE0-D3(BJ)/[SDD/6-31G(d,p)] level. Optimizations are conducted in acetonitrile by using the CPCM model. Thermochemical data are given at  $T = 298.15$  K and  $P = 1$  Atm.

| <b>Energies (a.u.)</b>                             |             |              |             |
|----------------------------------------------------|-------------|--------------|-------------|
| <b>Sum of electronic and zero-point Energies</b>   |             | -1883.721227 |             |
| <b>Sum of electronic and thermal Enthalpies</b>    |             | -1883.691107 |             |
| <b>Sum of electronic and thermal Free Energies</b> |             | -1883.780051 |             |
| C                                                  | -2.59455100 | -0.58952800  | 0.71632000  |
| C                                                  | -2.09254400 | 1.69977200   | 0.37094500  |
| C                                                  | -3.87219500 | -0.26799500  | 1.16489200  |
| C                                                  | -3.36156200 | 2.06992000   | 0.80742600  |
| C                                                  | -4.25024700 | 1.07149900   | 1.19691700  |
| H                                                  | -4.56058100 | -1.03851400  | 1.48952600  |
| H                                                  | -3.65442200 | 3.11145200   | 0.85304500  |
| H                                                  | -5.24256900 | 1.34079600   | 1.54071200  |
| C                                                  | -0.99416000 | 2.59701500   | -0.03242200 |
| C                                                  | 1.22531000  | 2.71951100   | -0.73727200 |
| C                                                  | -1.09826500 | 3.98259900   | -0.03924500 |
| C                                                  | 1.18391900  | 4.10755400   | -0.75982000 |
| H                                                  | 2.12308400  | 2.17331200   | -1.00447600 |
| C                                                  | 0.00210900  | 4.74785300   | -0.40988700 |
| H                                                  | -0.06652600 | 5.83001200   | -0.41996700 |
| N                                                  | -1.76356000 | 0.39458600   | 0.32004500  |
| C                                                  | 2.66528300  | -0.97203000  | -1.69234700 |
| C                                                  | 2.88428900  | -0.40788900  | 0.54875200  |
| C                                                  | 4.02922300  | -1.18994300  | -1.81616500 |
| H                                                  | 1.98792500  | -1.14725200  | -2.52114800 |
| C                                                  | 4.26085200  | -0.60935900  | 0.48791900  |
| C                                                  | 4.84565500  | -0.99563500  | -0.70942700 |
| H                                                  | 4.43143500  | -1.50904800  | -2.77066900 |
| H                                                  | 4.87362700  | -0.47043900  | 1.36932600  |
| H                                                  | 5.91720200  | -1.15125900  | -0.77000400 |
| C                                                  | 0.12117700  | 0.39706500   | 2.76271800  |
| C                                                  | 2.18445000  | -0.03737600  | 1.78420900  |
| C                                                  | 0.69672800  | 0.58816200   | 4.00873000  |
| H                                                  | -0.94898000 | 0.48810500   | 2.62867800  |
| C                                                  | 2.82452300  | 0.14916900   | 3.00756800  |
| C                                                  | 2.07561800  | 0.46698900   | 4.13140100  |
| H                                                  | 2.56403300  | 0.61468200   | 5.08834000  |

---

|    |             |             |             |
|----|-------------|-------------|-------------|
| N  | 2.09492300  | -0.57065200 | -0.54395500 |
| Ru | 0.06807800  | -0.09600600 | -0.24667100 |
| N  | 0.84215000  | 0.09627000  | 1.67406600  |
| H  | 0.06762600  | 0.82930900  | 4.85729300  |
| H  | 3.89923900  | 0.04651500  | 3.08578100  |
| H  | -2.02745600 | 4.46183300  | 0.24463000  |
| H  | 2.06725100  | 4.66467700  | -1.04888600 |
| N  | 0.16725400  | 1.97776700  | -0.39305300 |
| S  | -0.57292400 | -0.38040700 | -2.42435700 |
| O  | 0.01024300  | -1.57888300 | -3.12309200 |
| C  | -0.22564900 | 1.05287800  | -3.44541200 |
| H  | -0.74470500 | 1.92637500  | -3.04748100 |
| H  | 0.85325700  | 1.21285400  | -3.42498800 |
| H  | -0.55715600 | 0.82892700  | -4.46105600 |
| C  | -2.35142500 | -0.48005700 | -2.64155700 |
| H  | -2.70114600 | -1.36222400 | -2.10363800 |
| H  | -2.82941900 | 0.42177200  | -2.25609300 |
| H  | -2.54431300 | -0.59489800 | -3.70961800 |
| C  | -1.99490800 | -1.93388400 | 0.63032700  |
| C  | -2.67131800 | -3.10115900 | 0.96235000  |
| C  | -0.07924600 | -3.14825200 | 0.08568700  |
| C  | -2.01745000 | -4.32337600 | 0.84898500  |
| H  | -3.69861200 | -3.05976100 | 1.30347700  |
| C  | -0.70146800 | -4.34824500 | 0.40570200  |
| H  | 0.94433000  | -3.11166200 | -0.26849200 |
| H  | -2.53409500 | -5.24202100 | 1.10420900  |
| H  | -0.15465700 | -5.27823900 | 0.30375400  |
| N  | -0.70360200 | -1.97154600 | 0.19174700  |

---



**Table S6.** Optimized Cartesian coordinates and energies of the  $\eta^2$ -[Ru(bpy)(tpy)(dmsO)]<sup>2+</sup> at PBE0-D3(BJ)/[SDD/6-31G(d,p)] level. Optimizations are conducted in acetonitrile by using the CPCM model. Thermochemical data are given at  $T = 298.15$  K and  $P = 1$  Atm.

|                                                    |              |             |             |
|----------------------------------------------------|--------------|-------------|-------------|
| <b>Imaginary frequency</b>                         | -226.7       |             |             |
| <b>IR Inten</b>                                    | 26.3         |             |             |
| <b>Energies (a.u.)</b>                             |              |             |             |
| <b>Sum of electronic and zero-point Energies</b>   | -1883.680479 |             |             |
| <b>Sum of electronic and thermal Enthalpies</b>    | -1883.649889 |             |             |
| <b>Sum of electronic and thermal Free Energies</b> | -1883.741381 |             |             |
| C                                                  | -2.49607900  | -0.86569700 | 0.80876800  |
| C                                                  | -2.26765500  | 1.46270800  | 0.43637500  |
| C                                                  | -3.82885100  | -0.70294900 | 1.17564200  |
| C                                                  | -3.59566200  | 1.67574100  | 0.79485700  |
| C                                                  | -4.37036500  | 0.57990000  | 1.16581700  |
| H                                                  | -4.43756900  | -1.55235800 | 1.46051200  |
| H                                                  | -4.02402100  | 2.67047000  | 0.78608000  |
| H                                                  | -5.40688200  | 0.72669300  | 1.44801800  |
| C                                                  | -1.28224600  | 2.47770700  | 0.02113600  |
| C                                                  | 0.91333500   | 2.85779200  | -0.66568300 |
| C                                                  | -1.56401800  | 3.83669400  | -0.04914000 |
| C                                                  | 0.69334000   | 4.22640000  | -0.75213500 |
| H                                                  | 1.87700600   | 2.42122200  | -0.90248400 |
| C                                                  | -0.56647600  | 4.72246400  | -0.44152300 |
| H                                                  | -0.77440300  | 5.78515900  | -0.50048000 |
| N                                                  | -1.76768300  | 0.21223800  | 0.45899400  |
| C                                                  | 2.61295300   | -0.61462300 | -1.78173000 |
| C                                                  | 2.95471300   | -0.20184400 | 0.48342300  |
| C                                                  | 3.97517300   | -0.75854000 | -1.99944000 |
| H                                                  | 1.87628300   | -0.73895200 | -2.56815700 |
| C                                                  | 4.33209800   | -0.33470200 | 0.32996100  |
| C                                                  | 4.84976500   | -0.61230200 | -0.92773400 |
| H                                                  | 4.33542300   | -0.98354800 | -2.99662500 |
| H                                                  | 4.99403100   | -0.22495400 | 1.17989000  |
| H                                                  | 5.92035500   | -0.71735900 | -1.06552200 |
| C                                                  | 0.23343700   | 0.39765300  | 2.81627200  |
| C                                                  | 2.28881600   | 0.07369700  | 1.75769100  |
| C                                                  | 0.84583900   | 0.56236400  | 4.04708400  |
| H                                                  | -0.84177100  | 0.45872000  | 2.71334300  |

---

|    |             |             |             |
|----|-------------|-------------|-------------|
| C  | 2.95482800  | 0.23473200  | 2.96948800  |
| C  | 2.23150100  | 0.48120700  | 4.12708000  |
| H  | 2.74261000  | 0.60769100  | 5.07495100  |
| N  | 2.11111000  | -0.33397200 | -0.56930100 |
| Ru | 0.10853500  | -0.05944700 | -0.10632500 |
| N  | 0.93201900  | 0.15811400  | 1.69370600  |
| H  | 0.23486100  | 0.75282900  | 4.92145900  |
| H  | 4.03491800  | 0.16616000  | 3.00659000  |
| H  | -2.55254100 | 4.20245300  | 0.20160200  |
| H  | 1.50095700  | 4.88013300  | -1.05997400 |
| N  | -0.04324700 | 1.99984800  | -0.29469000 |
| S  | -1.13704100 | 0.04767500  | -2.65397300 |
| O  | -0.25233800 | -1.20297900 | -2.67382800 |
| C  | -0.67000700 | 1.06512600  | -4.05582700 |
| H  | -1.34793800 | 1.91940200  | -4.11474100 |
| H  | 0.34864100  | 1.41125900  | -3.87458100 |
| H  | -0.71397700 | 0.46205300  | -4.96609800 |
| C  | -2.77860700 | -0.44665100 | -3.18465500 |
| H  | -3.18181300 | -1.10695100 | -2.41541800 |
| H  | -3.40389700 | 0.44417900  | -3.27588600 |
| H  | -2.70052100 | -0.97439800 | -4.13846100 |
| C  | -1.73797500 | -2.12868600 | 0.73610400  |
| C  | -2.27589700 | -3.36862900 | 1.05825600  |
| C  | 0.30495000  | -3.10793000 | 0.18951800  |
| C  | -1.48460500 | -4.50602000 | 0.93956000  |
| H  | -3.30158300 | -3.44689900 | 1.39823500  |
| C  | -0.17422500 | -4.37485000 | 0.49686200  |
| H  | 1.31790300  | -2.95121600 | -0.16318400 |
| H  | -1.89080700 | -5.48010000 | 1.18915600  |
| H  | 0.47614800  | -5.23481200 | 0.38790300  |
| N  | -0.44965100 | -2.01128300 | 0.30578100  |

---

**Table S7.** Optimized Cartesian coordinates and energies of the *O*-[Ru(bpy)(tpy)(dmsO)]<sup>2+</sup> at PBE0-D3(BJ)/[SDD/6-31G(d,p)] level. Optimizations are conducted in acetonitrile by using the CPCM model. Thermochemical data are given at  $T = 298.15$  K and  $P = 1$  Atm.

| <b>Energies (a.u.)</b>                             |             |             |              |
|----------------------------------------------------|-------------|-------------|--------------|
| <b>Sum of electronic and zero-point Energies</b>   |             |             | -1883.716475 |
| <b>Sum of electronic and thermal Enthalpies</b>    |             |             | -1883.685505 |
| <b>Sum of electronic and thermal Free Energies</b> |             |             | -1883.778217 |
| C                                                  | 2.14643600  | -0.48422300 | -1.48209700  |
| C                                                  | 1.93718200  | 1.76431500  | -0.77043100  |
| C                                                  | 3.32946900  | -0.18972300 | -2.15261100  |
| C                                                  | 3.11765300  | 2.10623900  | -1.42406000  |
| C                                                  | 3.80859500  | 1.11733000  | -2.11880400  |
| H                                                  | 3.87430200  | -0.95877300 | -2.68670300  |
| H                                                  | 3.49701900  | 3.12047300  | -1.39496800  |
| H                                                  | 4.72919100  | 1.36606700  | -2.63472200  |
| C                                                  | 1.06037700  | 2.65385300  | 0.00909400   |
| C                                                  | -0.89565800 | 2.79739600  | 1.26791500   |
| C                                                  | 1.30870900  | 4.00899900  | 0.19690200   |
| C                                                  | -0.70333300 | 4.15466100  | 1.48895900   |
| H                                                  | -1.75253300 | 2.27118100  | 1.67326900   |
| C                                                  | 0.41796600  | 4.76979700  | 0.94485000   |
| H                                                  | 0.59983300  | 5.82790200  | 1.09819400   |
| N                                                  | 1.48827700  | 0.49374700  | -0.82563300  |
| C                                                  | -2.06212700 | -0.82584300 | 2.35318600   |
| C                                                  | -3.04936200 | -0.34366600 | 0.29810100   |
| C                                                  | -3.28852400 | -1.14746400 | 2.91347700   |
| H                                                  | -1.13283400 | -0.87053800 | 2.91118100   |
| C                                                  | -4.31020800 | -0.65476600 | 0.80212200   |
| C                                                  | -4.43180300 | -1.06145200 | 2.12374000   |
| H                                                  | -3.33934400 | -1.45945100 | 3.95025200   |
| H                                                  | -5.18786200 | -0.58302300 | 0.17158100   |
| H                                                  | -5.40656800 | -1.30759600 | 2.53057200   |
| C                                                  | -1.14912400 | 0.73339700  | -2.60471800  |
| C                                                  | -2.78887700 | 0.09592000  | -1.07696600  |
| C                                                  | -2.09023300 | 0.92205000  | -3.60367800  |
| H                                                  | -0.09487800 | 0.90606400  | -2.78358200  |
| C                                                  | -3.77968300 | 0.27096000  | -2.03984400  |
| C                                                  | -3.43088500 | 0.68789400  | -3.31650200  |
| H                                                  | -4.19460000 | 0.82753100  | -4.07363700  |

---

|    |             |             |             |
|----|-------------|-------------|-------------|
| N  | -1.94285600 | -0.43447300 | 1.07584100  |
| Ru | -0.16171300 | 0.03755400  | 0.14572000  |
| N  | -1.48158000 | 0.33111600  | -1.36786200 |
| H  | -1.76772500 | 1.24845600  | -4.58551000 |
| H  | -4.81762300 | 0.08409400  | -1.79322400 |
| H  | 2.18930900  | 4.46707600  | -0.23753500 |
| H  | -1.42424100 | 4.70888300  | 2.07866800  |
| N  | -0.04274000 | 2.05901700  | 0.54860300  |
| S  | 2.26750100  | -1.03630900 | 1.93933500  |
| O  | 0.90841100  | -0.26799400 | 1.95768400  |
| C  | 3.29908200  | -0.06150000 | 3.02931700  |
| H  | 4.24033000  | -0.59146800 | 3.19002200  |
| H  | 3.48720800  | 0.88615600  | 2.52261900  |
| H  | 2.77226600  | 0.10147200  | 3.97170600  |
| C  | 1.97414800  | -2.46620900 | 2.97830900  |
| H  | 1.28524200  | -3.11714200 | 2.43770400  |
| H  | 2.92302200  | -2.98281800 | 3.13859800  |
| H  | 1.53687500  | -2.14176300 | 3.92493100  |
| C  | 1.48915000  | -1.79723000 | -1.37178100 |
| C  | 1.96761200  | -2.95348700 | -1.97706500 |
| C  | -0.29542600 | -2.97612000 | -0.44146900 |
| C  | 1.28402200  | -4.15069200 | -1.80002400 |
| H  | 2.86586200  | -2.91973200 | -2.58187000 |
| C  | 0.13383900  | -4.16300500 | -1.01934900 |
| H  | -1.18555400 | -2.93186400 | 0.17615400  |
| H  | 1.64703900  | -5.05969700 | -2.26701600 |
| H  | -0.43006100 | -5.07376100 | -0.85480400 |
| N  | 0.35896000  | -1.81938000 | -0.60578200 |

---

**Table S8.** Optimized Cartesian coordinates and energies of  $S$ -[Ru(bpy)(tpy)(dmsu)]<sup>3+</sup> at PBE0-D3(BJ)/[SDD/6-31G(d,p)] level. Optimizations are conducted in acetonitrile by using the CPCM model. Thermochemical data are given at  $T = 298.15$  K and  $P = 1$ Atm.

| <b>Energies (a.u.)</b>                             |             |              |             |
|----------------------------------------------------|-------------|--------------|-------------|
| <b>Sum of electronic and zero-point Energies</b>   |             | -1883.496732 |             |
| <b>Sum of electronic and thermal Enthalpies</b>    |             | -1883.466611 |             |
| <b>Sum of electronic and thermal Free Energies</b> |             | -1883.555606 |             |
| C                                                  | -2.55114400 | -0.83689700  | 0.70507300  |
| C                                                  | -2.25433300 | 1.49936200   | 0.50073600  |
| C                                                  | -3.85980300 | -0.65933700  | 1.14038900  |
| C                                                  | -3.55733300 | 1.72880700   | 0.92838500  |
| C                                                  | -4.36074900 | 0.63509800   | 1.23559900  |
| H                                                  | -4.47525600 | -1.50873300  | 1.40822500  |
| H                                                  | -3.93660100 | 2.73740900   | 1.03310300  |
| H                                                  | -5.37964100 | 0.79357100   | 1.56967400  |
| C                                                  | -1.23783200 | 2.51087600   | 0.19075600  |
| C                                                  | 1.00877900  | 2.82900000   | -0.38801600 |
| C                                                  | -1.44120600 | 3.88075000   | 0.26085500  |
| C                                                  | 0.86222100  | 4.20748800   | -0.33143300 |
| H                                                  | 1.95467500  | 2.36810600   | -0.64632300 |
| C                                                  | -0.37959700 | 4.73886900   | -0.00820700 |
| H                                                  | -0.52428700 | 5.81210200   | 0.04213300  |
| N                                                  | -1.80417900 | 0.23575800   | 0.37879500  |
| C                                                  | 2.61815900  | -0.62448400  | -1.90704200 |
| C                                                  | 2.94604600  | -0.23745800  | 0.37815100  |
| C                                                  | 3.98062500  | -0.72949400  | -2.12463100 |
| H                                                  | 1.90447500  | -0.78475200  | -2.70722900 |
| C                                                  | 4.32172000  | -0.32929700  | 0.21420600  |
| C                                                  | 4.84659700  | -0.56847200  | -1.04979500 |
| H                                                  | 4.34454300  | -0.93697100  | -3.12352800 |
| H                                                  | 4.98309200  | -0.22018800  | 1.06357000  |
| H                                                  | 5.91995500  | -0.63876100  | -1.18660400 |
| C                                                  | 0.24858500  | 0.19624900   | 2.76635500  |
| C                                                  | 2.29559000  | -0.02535000  | 1.67288500  |
| C                                                  | 0.87127300  | 0.30793800   | 3.99948200  |
| H                                                  | -0.82962700 | 0.23707200   | 2.68331600  |
| C                                                  | 2.97809900  | 0.08608400   | 2.87980700  |
| C                                                  | 2.25835300  | 0.25581300   | 4.05498200  |
| H                                                  | 2.77840800  | 0.34341400   | 5.00233000  |

---

|    |             |             |             |
|----|-------------|-------------|-------------|
| N  | 2.10576700  | -0.36537600 | -0.68824000 |
| Ru | 0.09842300  | -0.06415700 | -0.25643500 |
| N  | 0.94451400  | 0.03616800  | 1.63424200  |
| H  | 0.26862100  | 0.43475500  | 4.89054200  |
| H  | 4.05897100  | 0.03850500  | 2.90797700  |
| H  | -2.41463300 | 4.27474300  | 0.52551300  |
| H  | 1.71603500  | 4.84036800  | -0.54054800 |
| N  | -0.02078900 | 2.00595100  | -0.14994800 |
| S  | -0.71026900 | -0.24330400 | -2.46785200 |
| O  | -0.08704700 | -1.39792700 | -3.18783000 |
| C  | -0.41326000 | 1.25949100  | -3.39304000 |
| H  | -0.93923500 | 2.09514500  | -2.92823200 |
| H  | 0.66296500  | 1.43842200  | -3.39653400 |
| H  | -0.77148900 | 1.09011100  | -4.41052100 |
| C  | -2.48676100 | -0.39491200 | -2.59987400 |
| H  | -2.78253200 | -1.31628500 | -2.09750100 |
| H  | -2.97732900 | 0.47352100  | -2.15885200 |
| H  | -2.71494700 | -0.46509500 | -3.66513700 |
| C  | -1.82877800 | -2.10770200 | 0.57901200  |
| C  | -2.37113300 | -3.35602800 | 0.84331200  |
| C  | 0.25460700  | -3.06352600 | 0.09721400  |
| C  | -1.56553200 | -4.48433000 | 0.72112400  |
| H  | -3.40733900 | -3.44986800 | 1.14335100  |
| C  | -0.23616400 | -4.33713200 | 0.34786500  |
| H  | 1.28274700  | -2.89612100 | -0.19903600 |
| H  | -1.97644000 | -5.46706100 | 0.92300900  |
| H  | 0.42521900  | -5.18919900 | 0.24892000  |
| N  | -0.52852000 | -1.98299600 | 0.19727900  |

---

**Table S9.** Optimized Cartesian coordinates and energies of  $\eta^2$ -[Ru(bpy)(tpy)(dmsO)]<sup>3+</sup> at PBE0-D3(BJ)/[SDD/6-31G(d,p)] level. Optimizations are conducted in acetonitrile by using the CPCM model. Thermochemical data are given at  $T = 298.15$  K and  $P = 1$  Atm.

|                                                    |              |             |             |
|----------------------------------------------------|--------------|-------------|-------------|
| <b>Imaginary frequency</b>                         | -209.7       |             |             |
| <b>IR Inten</b>                                    | 19.7         |             |             |
| <b>Energies (a.u.)</b>                             |              |             |             |
| <b>Sum of electronic and zero-point Energies</b>   | -1883.477428 |             |             |
| <b>Sum of electronic and thermal Enthalpies</b>    | -1883.447225 |             |             |
| <b>Sum of electronic and thermal Free Energies</b> | -1883.537173 |             |             |
| C                                                  | -2.58520400  | -0.84062900 | 0.75495100  |
| C                                                  | -2.28664000  | 1.48861500  | 0.41857100  |
| C                                                  | -3.90034200  | -0.64032400 | 1.16550000  |
| C                                                  | -3.59376300  | 1.73800900  | 0.82112400  |
| C                                                  | -4.39771600  | 0.65899300  | 1.18288500  |
| H                                                  | -4.52179500  | -1.47177900 | 1.47329900  |
| H                                                  | -3.98258400  | 2.74755200  | 0.86297200  |
| H                                                  | -5.41972600  | 0.83636600  | 1.49787000  |
| C                                                  | -1.26672800  | 2.48621800  | 0.04626400  |
| C                                                  | 0.95971900   | 2.81456500  | -0.59390700 |
| C                                                  | -1.49523100  | 3.85414900  | 0.03827200  |
| C                                                  | 0.78990500   | 4.19244600  | -0.61596400 |
| H                                                  | 1.90889700   | 2.35534300  | -0.84223500 |
| C                                                  | -0.45536400  | 4.71670300  | -0.29803600 |
| H                                                  | -0.62234400  | 5.78799900  | -0.30664200 |
| N                                                  | -1.84414100  | 0.21795100  | 0.37838400  |
| C                                                  | 2.57028200   | -0.58618300 | -1.93064900 |
| C                                                  | 2.89671900   | -0.10764800 | 0.32273200  |
| C                                                  | 3.93706500   | -0.62598600 | -2.16016800 |
| H                                                  | 1.85503800   | -0.79834800 | -2.71386700 |
| C                                                  | 4.27727400   | -0.12714600 | 0.15613900  |
| C                                                  | 4.80449100   | -0.38177400 | -1.10270600 |
| H                                                  | 4.30223200   | -0.84753700 | -3.15583800 |
| H                                                  | 4.93588800   | 0.04853300  | 0.99678200  |
| H                                                  | 5.87857800   | -0.39860600 | -1.24968500 |
| C                                                  | 0.16563600   | 0.18264500  | 2.70680900  |
| C                                                  | 2.23125700   | 0.09999200  | 1.60761800  |
| C                                                  | 0.77946800   | 0.36850900  | 3.93249300  |
| H                                                  | -0.91131000  | 0.13768700  | 2.62556400  |

---

|    |             |             |             |
|----|-------------|-------------|-------------|
| C  | 2.89646800  | 0.29214000  | 2.81343400  |
| C  | 2.16711400  | 0.43090500  | 3.98569100  |
| H  | 2.67884900  | 0.58117700  | 4.92966900  |
| N  | 2.05759600  | -0.31654600 | -0.72170300 |
| Ru | 0.02740300  | -0.10400200 | -0.25027900 |
| N  | 0.87402300  | 0.05812900  | 1.57298100  |
| H  | 0.16824100  | 0.46418400  | 4.82146700  |
| H  | 3.97792800  | 0.32855500  | 2.83795700  |
| H  | -2.47136700 | 4.24770900  | 0.29350100  |
| H  | 1.62557500  | 4.82914700  | -0.87991500 |
| N  | -0.04011500 | 1.98601700  | -0.27794100 |
| S  | -0.99149500 | -0.00839900 | -2.56879000 |
| O  | -0.26261400 | -1.34670400 | -2.34118500 |
| C  | -0.36621500 | 0.77794500  | -4.04276800 |
| H  | -0.96044200 | 1.67640700  | -4.22067200 |
| H  | 0.67284100  | 1.04974100  | -3.85429700 |
| H  | -0.44820900 | 0.07264200  | -4.87271400 |
| C  | -2.69519800 | -0.34433100 | -2.97588700 |
| H  | -3.13140600 | -0.87288300 | -2.12783400 |
| H  | -3.20348100 | 0.60897300  | -3.13354400 |
| H  | -2.72043600 | -0.96560400 | -3.87372100 |
| C  | -1.84713700 | -2.11198800 | 0.71474500  |
| C  | -2.39141800 | -3.33963900 | 1.06559100  |
| C  | 0.22704500  | -3.10063200 | 0.28523400  |
| C  | -1.58756800 | -4.47405400 | 1.02091400  |
| H  | -3.42775800 | -3.41121400 | 1.37193200  |
| C  | -0.26023100 | -4.35440800 | 0.62939600  |
| H  | 1.25110100  | -2.95453600 | -0.03706500 |
| H  | -1.99837000 | -5.44011000 | 1.29237500  |
| H  | 0.39783600  | -5.21367800 | 0.58342500  |
| N  | -0.54692200 | -2.01342800 | 0.32398900  |

---



**Table S10.** Optimized Cartesian coordinates and energies of *O*-[Ru(bpy)(tpy)(dmsO)]<sup>3+</sup> at PBE0-D3(BJ)/[SDD/6-31G(d,p)] level. Optimizations are conducted in acetonitrile by using the CPCM model. Thermochemical data are given at *T* = 298.15 K and *P* = 1Atm.

| <b>Energies (a.u.)</b>                             |             |              |             |
|----------------------------------------------------|-------------|--------------|-------------|
| <b>Sum of electronic and zero-point Energies</b>   |             | -1883.518063 |             |
| <b>Sum of electronic and thermal Enthalpies</b>    |             | -1883.487170 |             |
| <b>Sum of electronic and thermal Free Energies</b> |             | -1883.579517 |             |
| <hr/>                                              |             |              |             |
| C                                                  | 2.15137500  | -0.92297600  | -1.31534300 |
| C                                                  | 2.00539700  | 1.43057200   | -1.10533500 |
| C                                                  | 3.35469800  | -0.81416900  | -2.00491700 |
| C                                                  | 3.20709200  | 1.59295500   | -1.78696100 |
| C                                                  | 3.87928800  | 0.45591500   | -2.22777800 |
| H                                                  | 3.87463300  | -1.69343200  | -2.36394700 |
| H                                                  | 3.61322000  | 2.57858800   | -1.97721000 |
| H                                                  | 4.81757400  | 0.56159100   | -2.76037700 |
| C                                                  | 1.12523400  | 2.49065400   | -0.58852600 |
| C                                                  | -0.89848500 | 2.93937600   | 0.50212000  |
| C                                                  | 1.38904300  | 3.84682500   | -0.70893700 |
| C                                                  | -0.68536300 | 4.30735000   | 0.41204200  |
| H                                                  | -1.78572700 | 2.53047300   | 0.97083600  |
| C                                                  | 0.47472200  | 4.76459200   | -0.20043700 |
| H                                                  | 0.66978600  | 5.82765600   | -0.28822400 |
| N                                                  | 1.53417700  | 0.19089200   | -0.88380100 |
| C                                                  | -2.03194500 | -0.29706100  | 2.53683500  |
| C                                                  | -3.04846200 | -0.18325700  | 0.43569200  |
| C                                                  | -3.26151700 | -0.40994200  | 3.16677500  |
| H                                                  | -1.09407900 | -0.29195800  | 3.08131600  |
| C                                                  | -4.30993600 | -0.29433000  | 1.01078500  |
| C                                                  | -4.41591500 | -0.40880200  | 2.39109800  |
| H                                                  | -3.30363800 | -0.49702300  | 4.24585900  |
| H                                                  | -5.19958700 | -0.29187600  | 0.39396900  |
| H                                                  | -5.39260400 | -0.49604600  | 2.85410600  |
| C                                                  | -1.16073200 | 0.14407400   | -2.65812700 |
| C                                                  | -2.80165200 | -0.05701700  | -1.00369400 |
| C                                                  | -2.11495800 | 0.17233100   | -3.66067900 |
| H                                                  | -0.10389000 | 0.21144600   | -2.88399100 |
| C                                                  | -3.80300300 | -0.03089700  | -1.96828500 |
| C                                                  | -3.45732400 | 0.08497100   | -3.30793800 |
| H                                                  | -4.23073800 | 0.10578100   | -4.06772100 |

---

|    |             |             |             |
|----|-------------|-------------|-------------|
| N  | -1.93181700 | -0.18733100 | 1.20519900  |
| Ru | -0.14668400 | -0.00630500 | 0.17501800  |
| N  | -1.49554200 | 0.03441800  | -1.36428500 |
| H  | -1.80191400 | 0.26228900  | -4.69374300 |
| H  | -4.84367100 | -0.10059000 | -1.67844100 |
| H  | 2.29510200  | 4.18666200  | -1.19503500 |
| H  | -1.42195500 | 4.99079200  | 0.81663800  |
| N  | -0.01467400 | 2.05667300  | 0.02277300  |
| S  | 2.42932800  | -0.22043300 | 2.09613500  |
| O  | 0.84905700  | -0.11825500 | 1.93138500  |
| C  | 2.76614800  | 1.10948900  | 3.24046900  |
| H  | 3.81353200  | 1.03603300  | 3.54184300  |
| H  | 2.59807300  | 2.04494200  | 2.70532500  |
| H  | 2.09897800  | 1.02149100  | 4.09971500  |
| C  | 2.58982800  | -1.64569600 | 3.16141900  |
| H  | 2.31190700  | -2.52139400 | 2.57308300  |
| H  | 3.63582600  | -1.72082400 | 3.46746800  |
| H  | 1.93081800  | -1.52599500 | 4.02309900  |
| C  | 1.42009900  | -2.15677600 | -0.98896100 |
| C  | 1.85325800  | -3.43098200 | -1.32555600 |
| C  | -0.51133500 | -3.03210500 | 0.00665000  |
| C  | 1.07217800  | -4.52829700 | -0.97611300 |
| H  | 2.78862800  | -3.56910000 | -1.85375600 |
| C  | -0.12632700 | -4.32866200 | -0.30228700 |
| H  | -1.43349200 | -2.82112300 | 0.53490500  |
| H  | 1.40055600  | -5.52950800 | -1.23235700 |
| H  | -0.76164100 | -5.15747700 | -0.01443600 |
| N  | 0.24332100  | -1.97748400 | -0.32174600 |

---

**Table S11.** Optimized Cartesian coordinates and energies of  $S$ -[Ru(bpy)(tpy)(dmsu)]<sup>+</sup> at PBE0-D3(BJ)/[SDD/6-31G(d,p)] level. Optimizations are conducted in acetonitrile by using the CPCM model. Thermochemical data are given at  $T = 298.15$  K and  $P = 1$ Atm.

| <b>Energies (a.u.)</b>                             |             |             |              |
|----------------------------------------------------|-------------|-------------|--------------|
| <b>Sum of electronic and zero-point Energies</b>   |             |             | -1883.844212 |
| <b>Sum of electronic and thermal Enthalpies</b>    |             |             | -1883.813585 |
| <b>Sum of electronic and thermal Free Energies</b> |             |             | -1883.904086 |
| C                                                  | 2.47212700  | 0.95212100  | 0.65355300   |
| C                                                  | 2.21066100  | -1.44087100 | 0.58806800   |
| C                                                  | 3.73981100  | 0.83110900  | 1.18835800   |
| C                                                  | 3.49803100  | -1.58690000 | 1.12327800   |
| C                                                  | 4.25964300  | -0.46358000 | 1.40571700   |
| H                                                  | 4.32149800  | 1.70587900  | 1.45408100   |
| H                                                  | 3.89264900  | -2.57560000 | 1.33237300   |
| H                                                  | 5.25394000  | -0.57782700 | 1.82296400   |
| C                                                  | 1.24769000  | -2.46391100 | 0.29946500   |
| C                                                  | -0.93401100 | -2.92473600 | -0.46686300  |
| C                                                  | 1.47623600  | -3.84768500 | 0.45335300   |
| C                                                  | -0.75648600 | -4.28565500 | -0.32649500  |
| H                                                  | -1.86925200 | -2.50999600 | -0.83036600  |
| C                                                  | 0.48847000  | -4.75306300 | 0.14437200   |
| H                                                  | 0.66731400  | -5.81683600 | 0.26316600   |
| N                                                  | 1.76549300  | -0.16373600 | 0.32511700   |
| C                                                  | -2.78464500 | 0.36521800  | -1.81145600  |
| C                                                  | -2.93025700 | 0.22993400  | 0.50147300   |
| C                                                  | -4.16268700 | 0.46645900  | -1.93413300  |
| H                                                  | -2.12512300 | 0.37836700  | -2.67497900  |
| C                                                  | -4.31945100 | 0.32436100  | 0.44331200   |
| C                                                  | -4.94787300 | 0.44163600  | -0.78769700  |
| H                                                  | -4.60293500 | 0.56130500  | -2.92035900  |
| H                                                  | -4.90854600 | 0.30673900  | 1.35170700   |
| H                                                  | -6.02849700 | 0.51452700  | -0.84666300  |
| C                                                  | -0.08417400 | -0.05042600 | 2.73679800   |
| C                                                  | -2.18803300 | 0.11977600  | 1.76253000   |
| C                                                  | -0.62329000 | -0.07055000 | 4.01359900   |
| H                                                  | 0.98493200  | -0.10935400 | 2.57620500   |
| C                                                  | -2.79220000 | 0.10467500  | 3.01900000   |
| C                                                  | -2.00408400 | 0.00740000  | 4.15652600   |
| H                                                  | -2.46339900 | -0.00591500 | 5.13902700   |

---

|    |             |             |             |
|----|-------------|-------------|-------------|
| N  | -2.16901000 | 0.24268400  | -0.62312900 |
| Ru | -0.10231500 | 0.03938600  | -0.30567500 |
| N  | -0.84345600 | 0.04064300  | 1.63645100  |
| H  | 0.03388700  | -0.14653900 | 4.87198700  |
| H  | -3.86891300 | 0.16967000  | 3.11122700  |
| H  | 2.43953500  | -4.18945300 | 0.81657000  |
| H  | -1.56203400 | -4.96544500 | -0.57762200 |
| N  | 0.02084600  | -2.02381800 | -0.17931700 |
| S  | 0.61704900  | 0.01665200  | -2.46134100 |
| O  | -0.35358200 | 0.27341800  | -3.58875800 |
| C  | 1.46391500  | -1.51592700 | -2.86028800 |
| H  | 2.26418700  | -1.68478400 | -2.13703700 |
| H  | 0.72941600  | -2.31925900 | -2.79809300 |
| H  | 1.85832400  | -1.42976400 | -3.87432200 |
| C  | 1.98349200  | 1.15456500  | -2.71867500 |
| H  | 1.60351300  | 2.16420200  | -2.55947900 |
| H  | 2.78305500  | 0.93267800  | -2.00960500 |
| H  | 2.32895000  | 1.03543000  | -3.74700600 |
| C  | 1.73113100  | 2.19086200  | 0.41026200  |
| C  | 2.24763900  | 3.46893400  | 0.63378400  |
| C  | -0.29540100 | 3.11758800  | -0.30740300 |
| C  | 1.46630100  | 4.58310500  | 0.37844300  |
| H  | 3.25929800  | 3.58162500  | 1.00617800  |
| C  | 0.16482400  | 4.40536600  | -0.09902500 |
| H  | -1.29527300 | 2.92265900  | -0.67999600 |
| H  | 1.86188000  | 5.57857100  | 0.54942300  |
| H  | -0.48291100 | 5.24861800  | -0.30891300 |
| N  | 0.45726500  | 2.03064700  | -0.07174900 |

---

**Table S12.** Optimized Cartesian coordinates and energies of  $\eta^2$ -[Ru(bpy)(tpy)(dmsO)]<sup>+</sup> at PBE0-D3(BJ)/[SDD/6-31G(d,p)] level. Optimizations are conducted in acetonitrile by using the CPCM model. Thermochemical data are given at  $T = 298.15$  K and  $P = 1$  Atm.

|                                                    |              |             |             |
|----------------------------------------------------|--------------|-------------|-------------|
| <b>Imaginary frequency</b>                         | -36.2        |             |             |
| <b>IR Inten.</b>                                   | 5.7          |             |             |
| <b>Energies (a.u.)</b>                             |              |             |             |
| <b>Sum of electronic and zero-point Energies</b>   | -1883.800391 |             |             |
| <b>Sum of electronic and thermal Enthalpies</b>    | -1883.774334 |             |             |
| <b>Sum of electronic and thermal Free Energies</b> | -1883.869306 |             |             |
| C                                                  | -0.28491700  | 0.76182600  | -0.29257400 |
| C                                                  | -0.06767100  | -1.61458500 | -0.15931000 |
| C                                                  | -0.76518700  | 0.65711700  | -1.59393000 |
| C                                                  | -0.54115900  | -1.74815100 | -1.45734900 |
| C                                                  | -0.88862400  | -0.60250900 | -2.17852600 |
| H                                                  | -1.04656400  | 1.54490200  | -2.14936300 |
| H                                                  | -0.65070100  | -2.72918800 | -1.90602500 |
| H                                                  | -1.26352000  | -0.69435600 | -3.19170200 |
| C                                                  | 0.30910400   | -2.67682100 | 0.76033600  |
| C                                                  | 1.01140500   | -3.17498700 | 2.93817700  |
| C                                                  | 0.33215100   | -4.03520800 | 0.43218900  |
| C                                                  | 1.04856300   | -4.52817600 | 2.66557600  |
| H                                                  | 1.27575300   | -2.78457600 | 3.91526400  |
| C                                                  | 0.69979700   | -4.96974200 | 1.38368200  |
| H                                                  | 0.72053700   | -6.02561700 | 1.13609800  |
| N                                                  | 0.05522500   | -0.37123600 | 0.39321600  |
| C                                                  | 0.33868600   | 0.03200700  | 5.23944300  |
| C                                                  | 2.54636900   | 0.04228200  | 4.49001300  |
| C                                                  | 0.74965700   | 0.14676600  | 6.55876300  |
| H                                                  | -0.70864100  | -0.01081300 | 4.94477100  |
| C                                                  | 3.02125000   | 0.15645400  | 5.79520300  |
| C                                                  | 2.11263400   | 0.20659600  | 6.84278400  |
| H                                                  | 0.00770800   | 0.18871900  | 7.34825300  |
| H                                                  | 4.08595900   | 0.20778700  | 5.98991200  |
| H                                                  | 2.46287700   | 0.29472300  | 7.86561100  |
| C                                                  | 3.37077300   | -0.13068300 | 0.96311100  |
| C                                                  | 3.38783800   | -0.00414900 | 3.29406000  |
| C                                                  | 4.75313400   | -0.07835400 | 0.90964900  |
| H                                                  | 2.76364700   | -0.20303200 | 0.06818600  |

---

|    |             |             |             |
|----|-------------|-------------|-------------|
| C  | 4.78026800  | 0.04884300  | 3.29994900  |
| C  | 5.47303500  | 0.01120200  | 2.09904000  |
| H  | 6.55668600  | 0.05208000  | 2.09053000  |
| N  | 1.21781400  | -0.02502200 | 4.22466700  |
| Ru | 0.69262400  | -0.20375700 | 2.23397100  |
| N  | 2.69649100  | -0.09632100 | 2.12615300  |
| H  | 5.25043700  | -0.10868600 | -0.05305500 |
| H  | 5.31604200  | 0.11996700  | 4.23908700  |
| H  | 0.06606400  | -4.34827800 | -0.57120600 |
| H  | 1.34475200  | -5.22386800 | 3.44245200  |
| N  | 0.64675900  | -2.25280900 | 2.02468100  |
| S  | -2.72247900 | 0.47573700  | 2.36498600  |
| O  | -2.55322100 | -0.02062600 | 3.79584000  |
| C  | -4.35251300 | -0.07688500 | 1.82798300  |
| H  | -4.56996800 | 0.35093600  | 0.84641800  |
| H  | -4.31559200 | -1.16512100 | 1.75338500  |
| H  | -5.10418200 | 0.22653100  | 2.56100300  |
| C  | -3.09367600 | 2.23585200  | 2.46412400  |
| H  | -2.19875800 | 2.73641800  | 2.83774800  |
| H  | -3.32821200 | 2.60856800  | 1.46433200  |
| H  | -3.93119300 | 2.39656700  | 3.14761100  |
| C  | -0.10069700 | 1.97089500  | 0.48842600  |
| C  | -0.34573900 | 3.26562400  | 0.01594600  |
| C  | 0.55117200  | 2.84243500  | 2.56607000  |
| C  | -0.14239100 | 4.35455200  | 0.84210200  |
| H  | -0.69430700 | 3.40667000  | -1.00108200 |
| C  | 0.32140800  | 4.13714300  | 2.14750600  |
| H  | 0.90724800  | 2.62383100  | 3.56715600  |
| H  | -0.33509400 | 5.35961500  | 0.48274200  |
| H  | 0.49849300  | 4.96071900  | 2.82983100  |
| N  | 0.33911700  | 1.76664500  | 1.77869600  |

---

**Table S13.** Optimized Cartesian coordinates and energies of *O*-[Ru(bpy)(tpy)(dmsO)]<sup>+</sup> at PBE0-D3(BJ)/[SDD/6-31G(d,p)] level. Optimizations are conducted in acetonitrile by using the CPCM model. Thermochemical data are given at  $T = 298.15$  K and  $P = 1$  Atm.

| <b>Energies (a.u.)</b>                             |             |             |              |
|----------------------------------------------------|-------------|-------------|--------------|
| <b>Sum of electronic and zero-point Energies</b>   |             |             | -1883.830678 |
| <b>Sum of electronic and thermal Enthalpies</b>    |             |             | -1883.799326 |
| <b>Sum of electronic and thermal Free Energies</b> |             |             | -1883.893477 |
| C                                                  | 2.16584600  | -0.37114700 | -1.45182000  |
| C                                                  | 1.83233200  | 1.89667200  | -0.73990600  |
| C                                                  | 3.32920200  | 0.02791500  | -2.13694800  |
| C                                                  | 2.97411300  | 2.31631700  | -1.39795900  |
| C                                                  | 3.72454100  | 1.35169800  | -2.10802200  |
| H                                                  | 3.91758600  | -0.70229500 | -2.68279000  |
| H                                                  | 3.28975000  | 3.35249600  | -1.37629500  |
| H                                                  | 4.62225900  | 1.65629700  | -2.63567000  |
| C                                                  | 0.90318900  | 2.73122500  | 0.03364500   |
| C                                                  | -1.06646200 | 2.76435300  | 1.28836300   |
| C                                                  | 1.05848400  | 4.10446000  | 0.21714100   |
| C                                                  | -0.96420200 | 4.12907000  | 1.50067800   |
| H                                                  | -1.89031600 | 2.18684800  | 1.69414400   |
| C                                                  | 0.12201400  | 4.81313500  | 0.95507800   |
| H                                                  | 0.23555900  | 5.88191100  | 1.10202400   |
| N                                                  | 1.45477200  | 0.59867900  | -0.78022600  |
| C                                                  | -2.09566800 | -0.91801000 | 2.33540500   |
| C                                                  | -3.04326400 | -0.50642600 | 0.24783400   |
| C                                                  | -3.31805200 | -1.30290400 | 2.86153200   |
| H                                                  | -1.18213900 | -0.91048600 | 2.92130800   |
| C                                                  | -4.30074100 | -0.88429900 | 0.71719100   |
| C                                                  | -4.44173400 | -1.28755400 | 2.03709400   |
| H                                                  | -3.38316300 | -1.60988400 | 3.89929900   |
| H                                                  | -5.16087100 | -0.86471600 | 0.05871800   |
| H                                                  | -5.41316900 | -1.58509300 | 2.41692700   |
| C                                                  | -1.11383700 | 0.67113300  | -2.59404500  |
| C                                                  | -2.76587400 | -0.05936200 | -1.11933000  |
| C                                                  | -2.02894100 | 0.79364900  | -3.62586500  |
| H                                                  | -0.06417000 | 0.90295100  | -2.72907400  |
| C                                                  | -3.73081300 | 0.04779600  | -2.11949900  |
| C                                                  | -3.36407000 | 0.47825800  | -3.38589400  |
| H                                                  | -4.10666300 | 0.56479800  | -4.17158000  |

---

|    |             |             |             |
|----|-------------|-------------|-------------|
| N  | -1.95378000 | -0.52957000 | 1.05750100  |
| Ru | -0.18520300 | 0.03940000  | 0.17206900  |
| N  | -1.46377600 | 0.25639000  | -1.36356800 |
| H  | -1.69275400 | 1.13153200  | -4.59953600 |
| H  | -4.76293800 | -0.20468300 | -1.90782300 |
| H  | 1.91085400  | 4.61176400  | -0.21996400 |
| H  | -1.72166500 | 4.64037400  | 2.08387400  |
| N  | -0.16447100 | 2.06865900  | 0.57722700  |
| S  | 2.36683700  | -0.80496500 | 1.89393900  |
| O  | 0.91388900  | -0.25119500 | 1.99654900  |
| C  | 3.14631600  | -0.14135900 | 3.36431600  |
| H  | 4.14312000  | -0.57643400 | 3.46363000  |
| H  | 3.22453500  | 0.93777900  | 3.22463900  |
| H  | 2.52872300  | -0.37220000 | 4.23496700  |
| C  | 2.24744500  | -2.52828500 | 2.38560800  |
| H  | 1.72208900  | -3.05517600 | 1.58718200  |
| H  | 3.25759200  | -2.93043300 | 2.49365400  |
| H  | 1.69390600  | -2.60049100 | 3.32452400  |
| C  | 1.61552300  | -1.68214400 | -1.32312600 |
| C  | 2.16860800  | -2.85283400 | -1.89309100 |
| C  | -0.11000800 | -2.98854700 | -0.37367500 |
| C  | 1.57605400  | -4.07471400 | -1.69012500 |
| H  | 3.07055200  | -2.77399800 | -2.49141700 |
| C  | 0.39813500  | -4.15372100 | -0.90816300 |
| H  | -1.01074000 | -2.99154500 | 0.23367100  |
| H  | 2.00719200  | -4.97019300 | -2.12634300 |
| H  | -0.10322700 | -5.09729600 | -0.72738500 |
| N  | 0.45978700  | -1.78168200 | -0.54459700 |

---



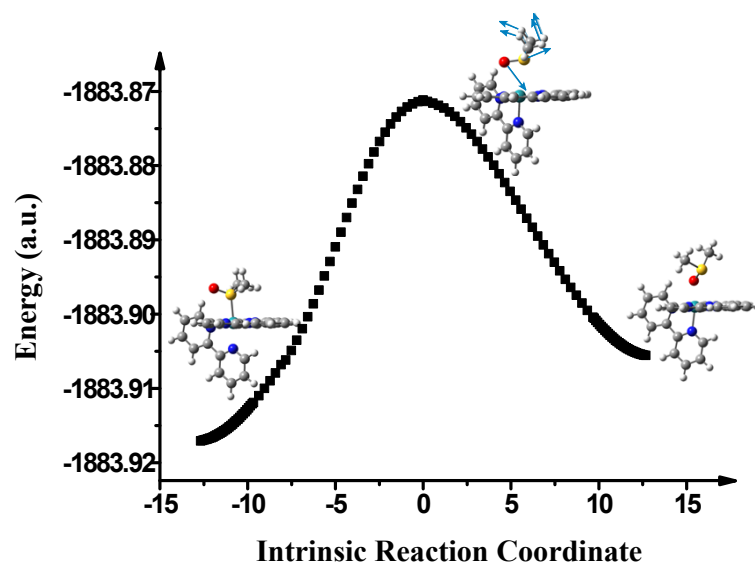

**Figure S1.** Intrinsic reaction coordinate (IRC) for intramolecular isomerization in  $[\text{Ru}(\text{bpy})(\text{tpy})(\text{dmsO})]^{2+}$  performed at the PBE0-D3(BJ)/[SDD/6-31G(d,p)] level. Optimized structures (Tables S5-S7 for Cartesian coordinates and transition vector are shown).

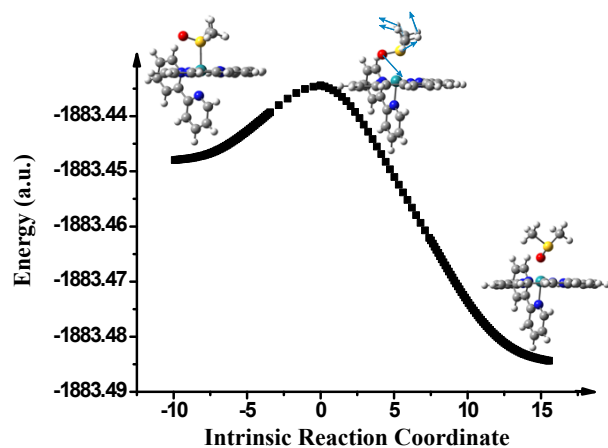

**Figure S2.** Intrinsic reaction coordinate (IRC) for intramolecular isomerization in  $[\text{Ru}(\text{bpy})(\text{tpy})(\text{dmsO})]^{3+}$  performed at the PBE0-D3(BJ)/[SDD/6-31G(d,p)] level. Optimized structures (Tables S8-S10 for Cartesian coordinates and transition vector are shown).

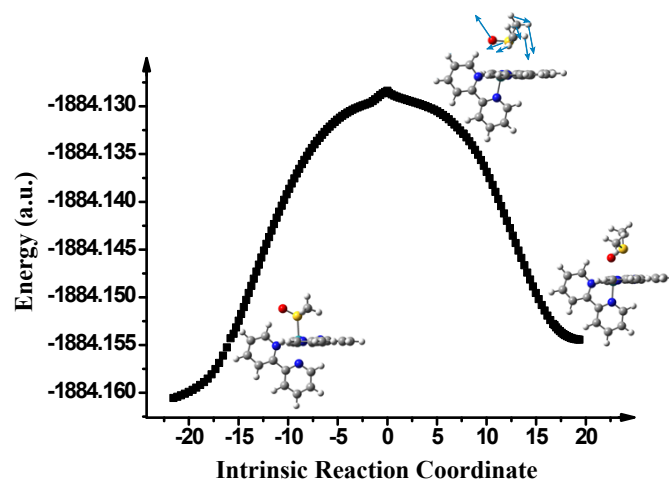

**Figure S3.** Intrinsic reaction coordinate (IRC) for intramolecular isomerization in  $[\text{Ru}(\text{bpy})(\text{tpy})(\text{dmsO})]^+$  performed at the PBE0-D3(BJ)/[SDD/6-31G(d,p)] level. Optimized structures (Tables S11-S13 for Cartesian coordinates and transition vector are shown).
